# Supplementary material
Source: Springer Nature journal article supplement (https://www.springermedizin.de/resource/supplementary/12939_2013_461_MOESM3_ESM.pdf/9551224)

**A**

Per Capita Health Expenditure  
by Location in Iran, 1984-2010

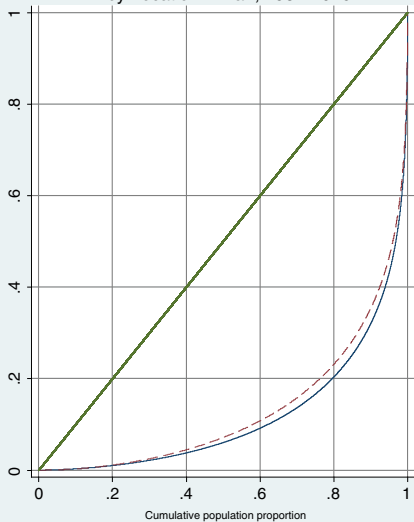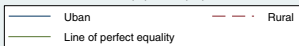**B**

Per Capita Total Expenditure(Income)  
by Location in Iran, 1984-2010

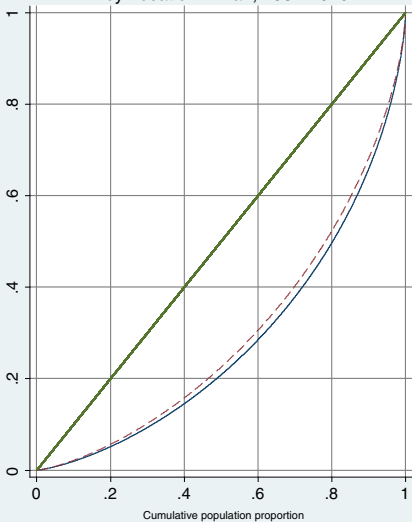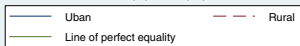

Supplement: MOESM3 [file 9551224]
